# Supplementary material for: Th1 Biased Progressive Autoimmunity in Aged Aire-Deficient Mice Accelerated Thymic Epithelial Cell Senescence
Source: PubMed Central journal article supplement (PMC6538216; doi:10.14336/ad.2018.0608), 2019-06-01
Supplement: AD-10-3-497-s.pdf [file AD-10-3-497-s.pdf]

## SUPPLEMENTARY DATA

# **Th1 Biased Progressive Autoimmunity in Aged *Aire*-Deficient Mice Accelerated Thymic Epithelial Cell Senescence**

**Jie Zhang, Yuqing Wang, Abudureyimujiang Aili, Xiuyuan Sun, Xuewen Pang, Qing Ge, Yu Zhang\*, Rong Jin\***

Department of Immunology, School of Basic Medical Sciences, Peking University Health Science Center, Key Laboratory of Medical Immunology, Ministry of Health (Peking University), Beijing, 100191, China.

## SUPPLEMENTARY DATA

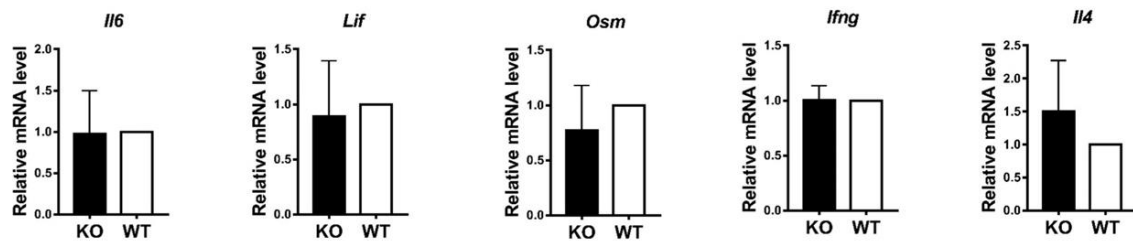

**Supplementary Figure 1. The cytokines production in *Aire*-deficient mice at early-middle aged stage.** The mRNA levels of *Il6*, *Lif*, *Osm*, *Ifng* and *Il4* in TECs of 6-month-old *Aire*-deficient mice and WT littermates were determined by quantitative PCR. The experiments were repeated 3 times with duplicates for each sample. Data are presented as Mean  $\pm$  SEM. Statistical differences between groups were determined by the Student's *t* test. No significance was detected in all compared groups.
